# Supplementary material for: Construction of mixed corrole–phthalocyanine europium triple-decker complexes involvingmeso-substitutedtrans-A2B-corrole
Source: Royal Society of Chemistry journal article supplement (doi:10.1039/c7nj04446a), 2018-01-01
Supplement: c7nj04446a1.pdf [file c7nj04446a1.pdf]

## Electronic Supplementary Information

### **Construction of mixed corrole-phthalocyanine europium triple-decker complexes involving *meso*-substituted *trans*-A<sub>2</sub>B-corrole**

Guifen Lu,\* Cheng He, Yuanyuan Fang, Liping Wang and Weihua Zhu

*School of Chemistry and Chemical Engineering, Jiangsu University, Zhenjiang 212013, P. R. China.*

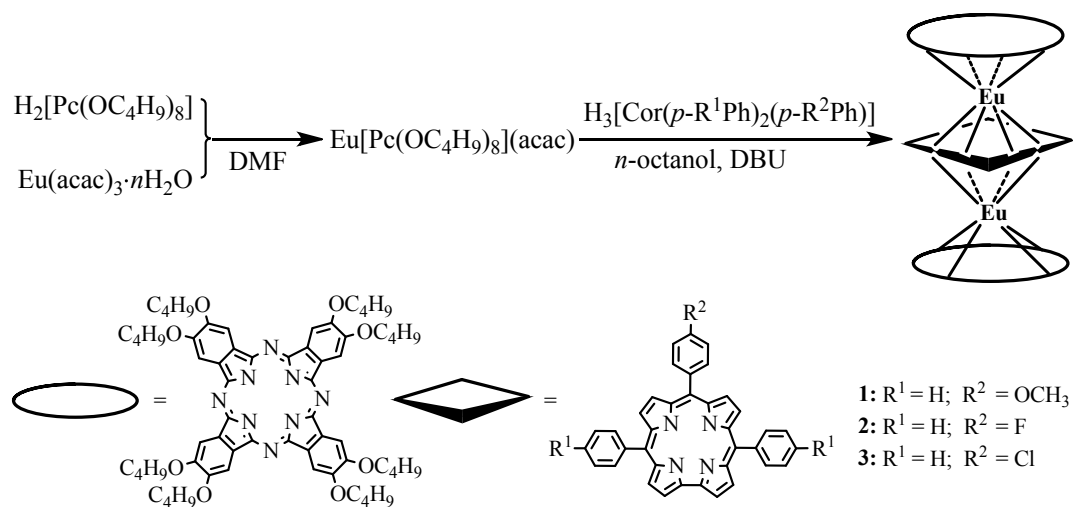

**Scheme S1.** Synthesis of europium triple decker complexes **1-3** with *meso*-substituted *trans*-A<sub>2</sub>B-corrolato and phthalocyaninato ligands.

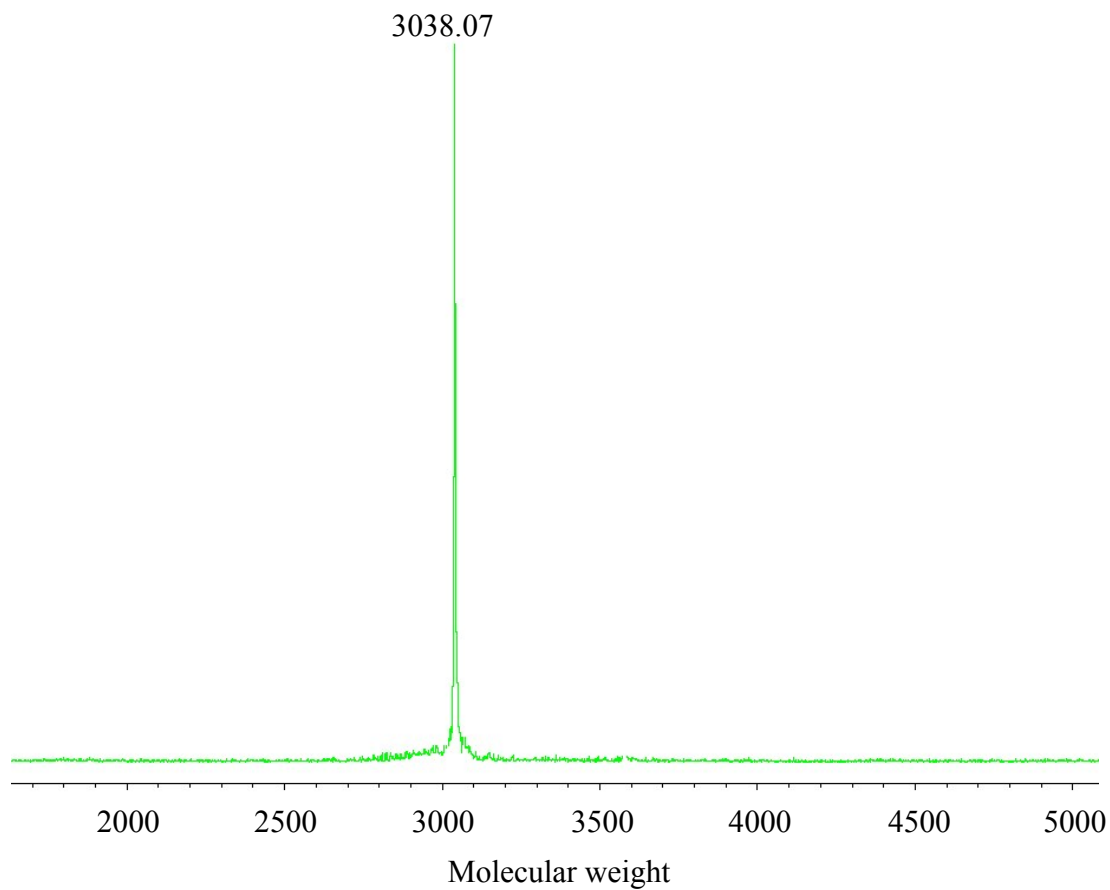

**Fig. S1.** MALDI-TOF mass spectrum of  $\text{Eu}_2[\text{Pc}(\text{OC}_4\text{H}_9)_8]_2[\text{Cor}(p\text{-HPh})_2(p\text{-CH}_3\text{OPh})]$  **1**.

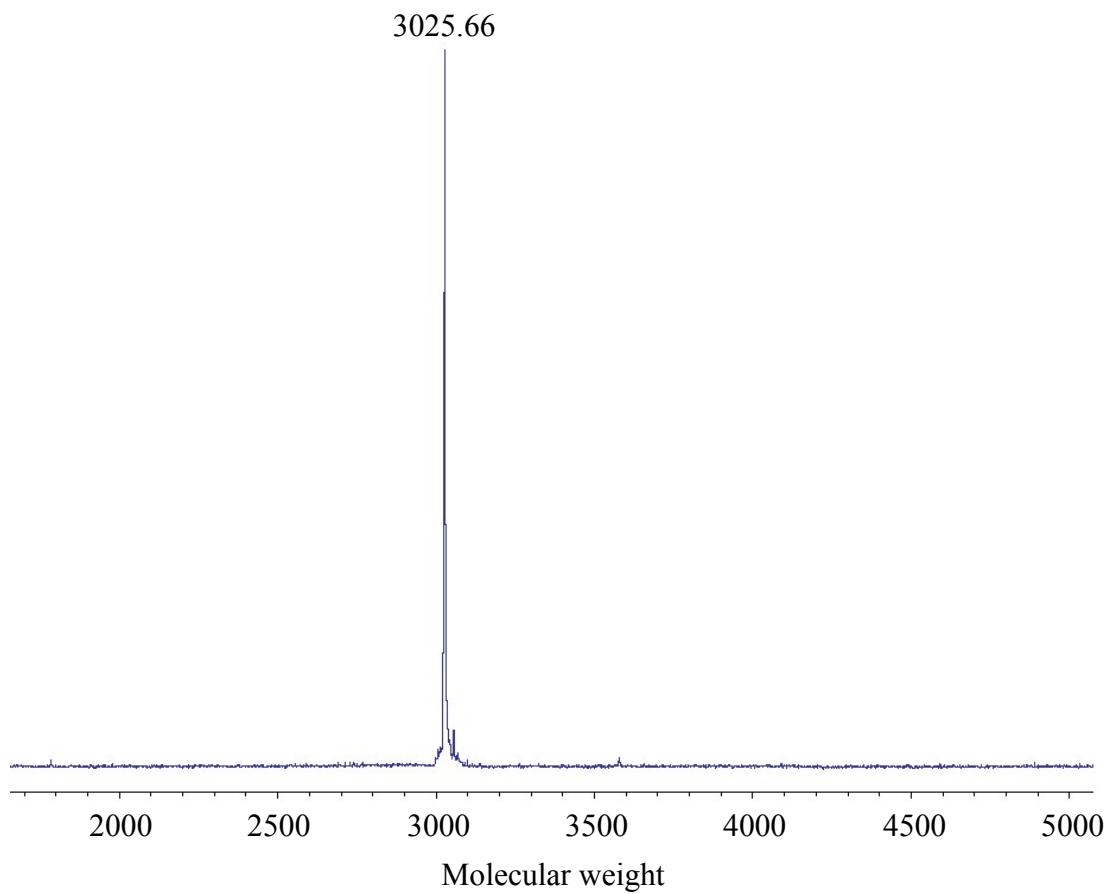

**Fig. S2.** MALDI-TOF mass spectrum of  $\text{Eu}_2[\text{Pc}(\text{OC}_4\text{H}_9)_8]_2[\text{Cor}(p\text{-HPh})_2(p\text{-FPh})]$  **2**.

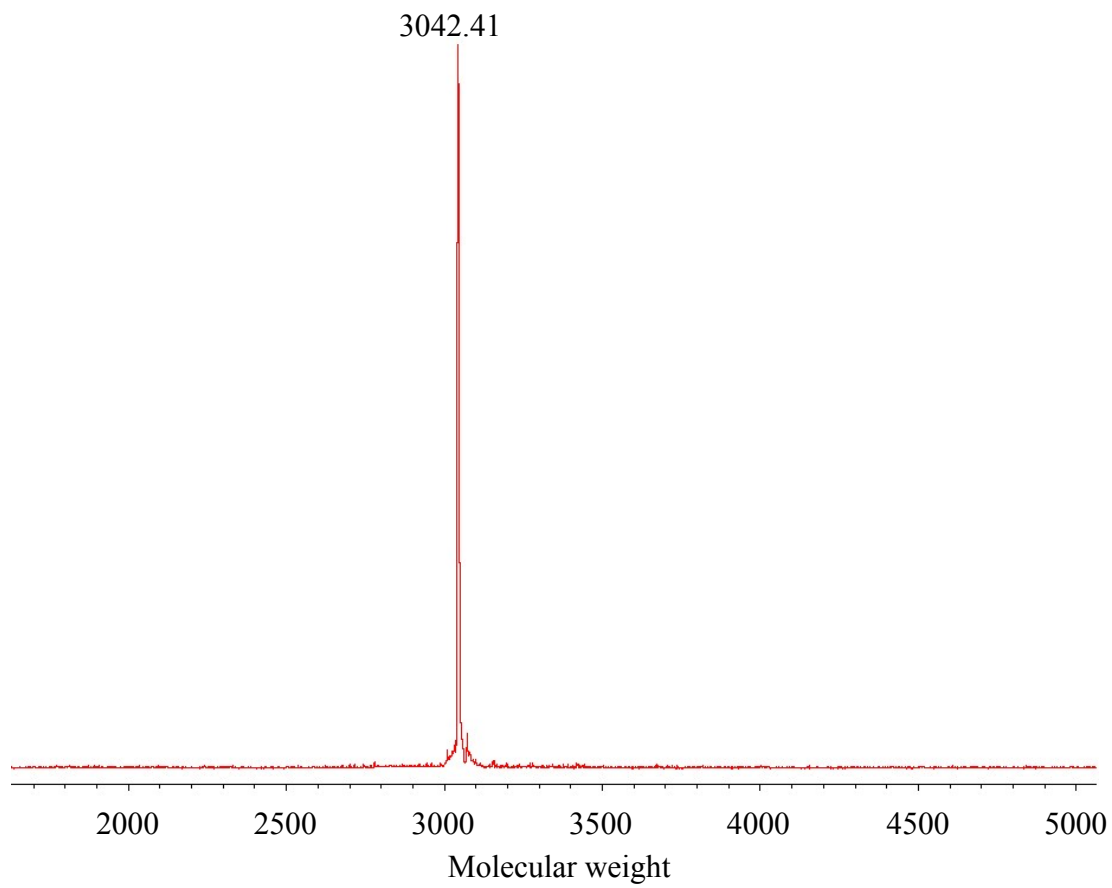

**Fig. S3.** MALDI-TOF mass spectrum of  $\text{Eu}_2[\text{Pc}(\text{OC}_4\text{H}_9)_8]_2[\text{Cor}(p\text{-HPh})_2(p\text{-ClPh})]$  **3**.

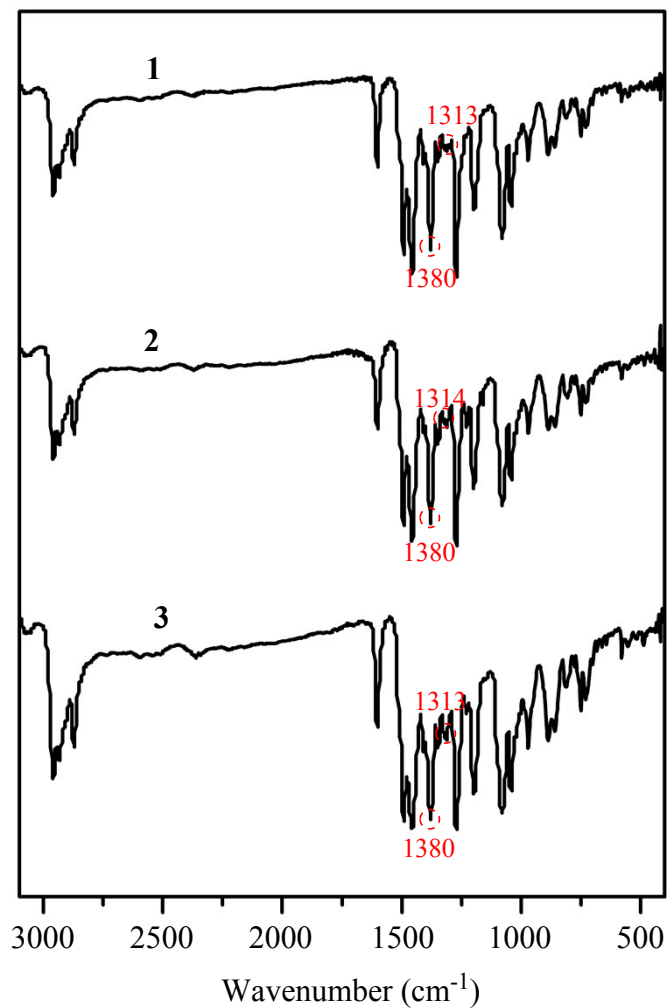

**Fig. S4.** IR spectra of compounds **1-3** in the region 400-3100 cm<sup>-1</sup> with 2 cm<sup>-1</sup> resolution, showing the diagnostic IR marker bands at 1313 and 1380 cm<sup>-1</sup> for [Pc(OC<sub>4</sub>H<sub>9</sub>)<sub>8</sub>]<sup>2-</sup>.

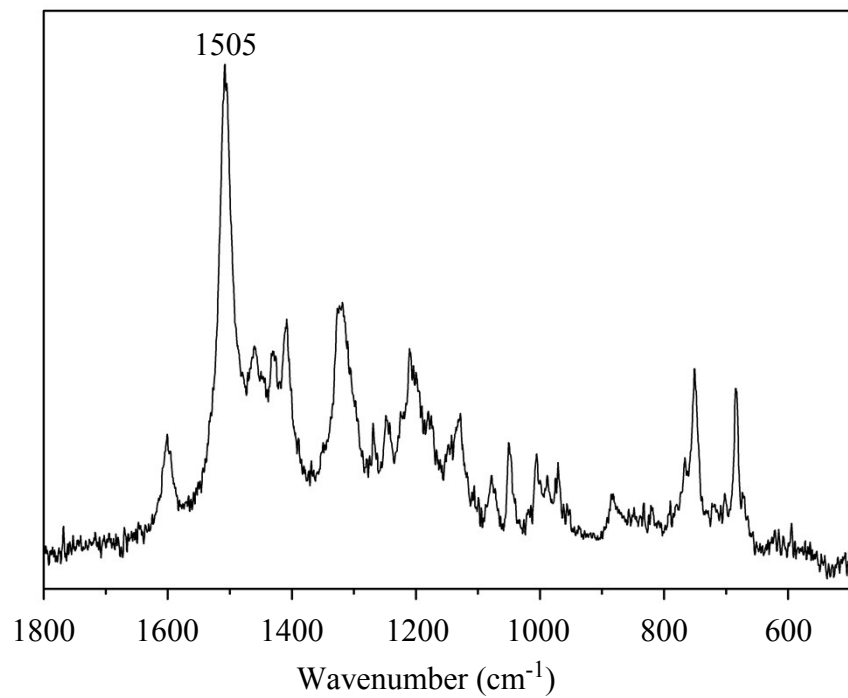

**Fig. S5.** Raman spectrum of  $\text{Eu}_2[\text{Pc}(\text{OC}_4\text{H}_9)_8]_2[\text{Cor}(p\text{-HPh})_2(p\text{-CH}_3\text{OPh})]$  **1** with excitation at 633 nm.

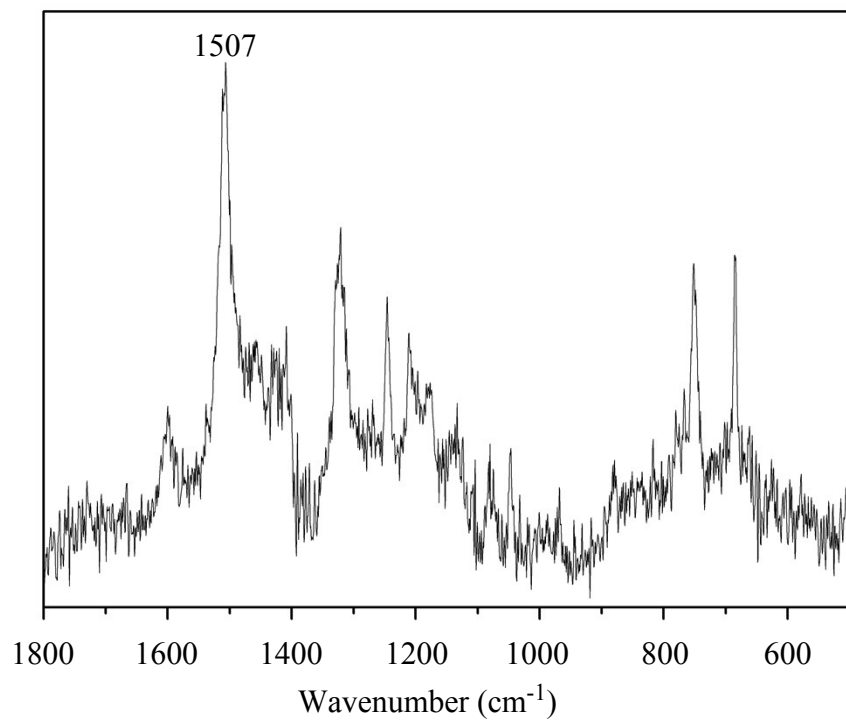

**Fig. S6.** Raman spectrum of  $\text{Eu}_2[\text{Pc}(\text{OC}_4\text{H}_9)_8]_2[\text{Cor}(p\text{-HPh})_2(p\text{-FPh})]$  **2** with excitation at 633 nm.



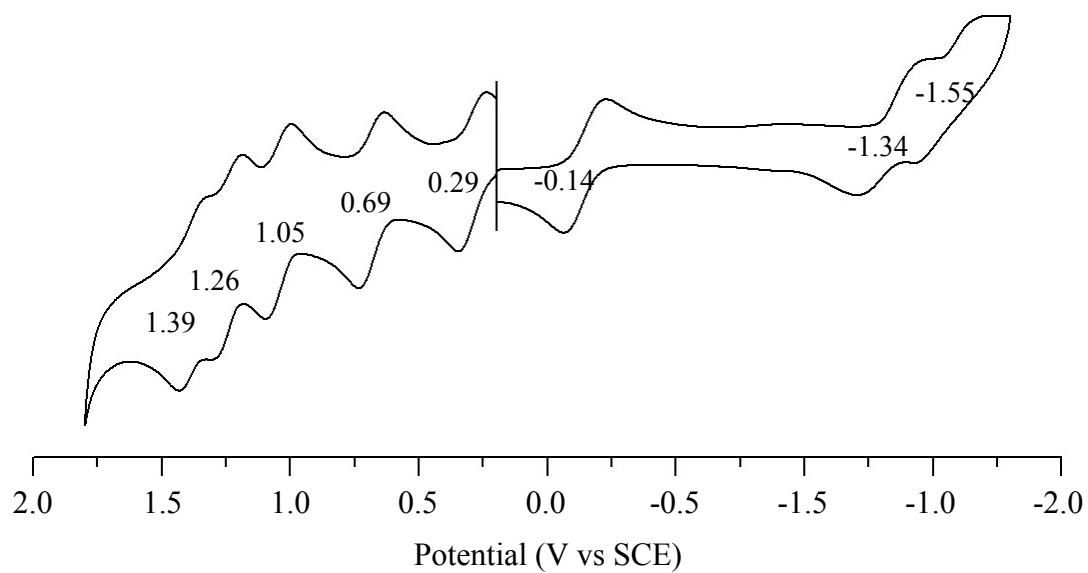

**Fig. S7.** Cyclic voltammogram of  $\text{Eu}_2[\text{Pc}(\text{OC}_4\text{H}_9)_8]_2[\text{Cor}(p\text{-HPh})_2(p\text{-FPh})]$  **2** in  $\text{CH}_2\text{Cl}_2$  containing 0.1 M TBAP.

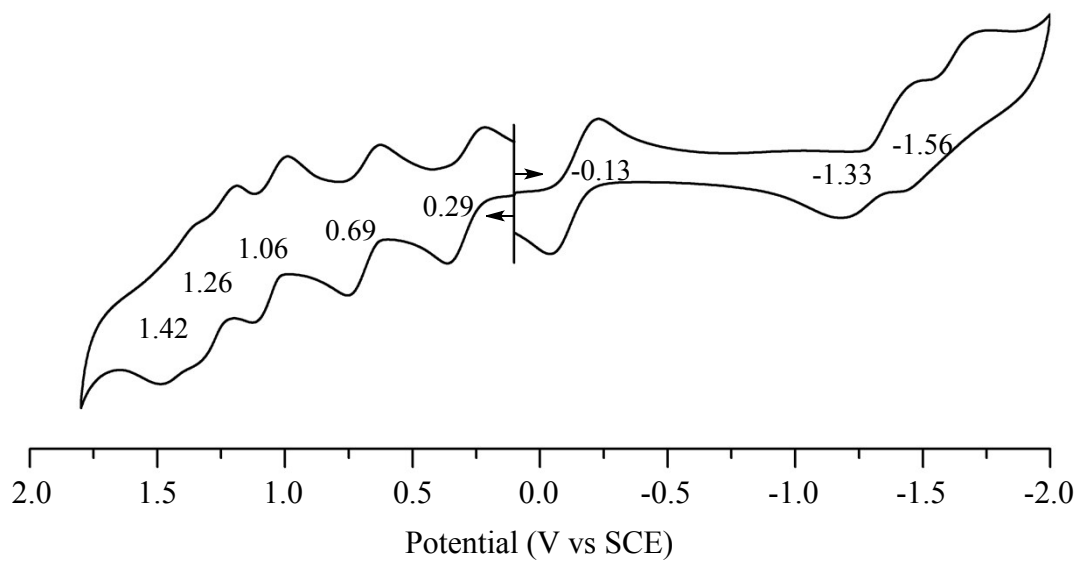

**Fig. S8.** Cyclic voltammogram of  $\text{Eu}_2[\text{Pc}(\text{OC}_4\text{H}_9)_8]_2[\text{Cor}(\rho\text{-HPh})_2(\rho\text{-ClPh})]$  **3** in  $\text{CH}_2\text{Cl}_2$  containing 0.1 M TBAP.

**Table S1.** Electronic absorption data for  $\text{Eu}_2[\text{Pc}(\text{OC}_4\text{H}_9)_8]_2[\text{Cor}(p\text{-R}^1\text{Ph})_2(p\text{-R}^2\text{Ph})]$  (**1-4**) in  $\text{CH}_2\text{Cl}_2$ .

| cpd      | R <sup>1</sup> | R <sup>2</sup>    | $\lambda_{\text{max}}/\text{nm}$ ( $\log\epsilon$ ) |            |            |                         |            | re<br>f   |
|----------|----------------|-------------------|-----------------------------------------------------|------------|------------|-------------------------|------------|-----------|
| <b>1</b> | H              | CH <sub>3</sub> O | 293 (5.04)                                          | 351 (5.17) | 421 (4.69) | 533 (4.36) <sup>a</sup> | 686 (4.73) | <i>tw</i> |
| <b>2</b> | H              | F                 | 293 (5.21)                                          | 352 (5.30) | 421 (4.91) | 531 (4.57) <sup>a</sup> | 682 (4.80) | <i>tw</i> |
| <b>3</b> | H              | Cl                | 293 (5.21)                                          | 351 (5.32) | 421 (4.90) | 532 (4.54) <sup>a</sup> | 680 (4.85) | <i>tw</i> |
| <b>4</b> | H              | NO <sub>2</sub>   | 294 (5.28)                                          | 351 (5.36) | 425 (4.97) | 542 (4.66) <sup>a</sup> | 674 (4.93) | 1         |

<sup>a</sup> Broad and weak band. *tw* = this work.

**Table S2.** The main Q band and corresponding energy of the compounds  $\text{Eu}_2[\text{Pc}(\text{OC}_4\text{H}_9)_8]_2[\text{Cor}(p\text{-R}^1\text{Ph})_2(p\text{-R}^2\text{Ph})]$  (**1-4**) in  $\text{CH}_2\text{Cl}_2$ .

| cpd      | substituent    |                   |                 | Q band/nm <sup>a</sup> | E/eV <sup>b</sup> | ref       |
|----------|----------------|-------------------|-----------------|------------------------|-------------------|-----------|
|          | R <sup>1</sup> | R <sup>2</sup>    | $\Sigma \sigma$ |                        |                   |           |
| <b>1</b> | H              | CH <sub>3</sub> O | -0.27           | 686                    | 1.809             | <i>tw</i> |
| <b>2</b> | H              | F                 | 0.06            | 682                    | 1.819             | <i>tw</i> |
| <b>3</b> | H              | Cl                | 0.23            | 680                    | 1.825             | <i>tw</i> |
| <b>4</b> | H              | NO <sub>2</sub>   | 0.78            | 674                    | 1.841             | 1         |

<sup>a</sup> The main Q band of the compounds  $\text{Eu}_2[\text{Pc}(\text{OC}_4\text{H}_9)_8]_2[\text{Cor}(p\text{-R}^1\text{Ph})_2(p\text{-R}^2\text{Ph})]$  (**1-4**) in  $\text{CH}_2\text{Cl}_2$ .

<sup>b</sup> Calculated from the main Q band of the compounds  $\text{Eu}_2[\text{Pc}(\text{OC}_4\text{H}_9)_8]_2[\text{Cor}(p\text{-R}^1\text{Ph})_2(p\text{-R}^2\text{Ph})]$  (**1-4**) in  $\text{CH}_2\text{Cl}_2$  according to  $E = hc/\lambda$ .

*tw* = this work.

**Table S3.** Characteristic Raman bands ( $\text{cm}^{-1}$ ) for  $\text{Eu}_2[\text{Pc}(\text{OC}_4\text{H}_9)_8]_2[\text{Cor}(\rho\text{-HPh})_2(\rho\text{-R}^2\text{Ph})]$  ( $\text{R}^2 = \text{CH}_3\text{O}$ , F or Cl) with excitation at 633 nm.

| 1       | 2       | 3       | assignment                                                        |
|---------|---------|---------|-------------------------------------------------------------------|
| 683 m   | 683 m   | 683 m   | macrocycle breathing                                              |
| 751 m   | 750 m   | 749 m   | $\delta$ macrocycle                                               |
| 883 w   | 879 w   | 882 w   |                                                                   |
| 968 w   | 969 w   | 969 w   |                                                                   |
| 1048 s  | 1049 w  | 1048 w  | $\delta$ C-H                                                      |
| 1078 s  | 1078 w  | 1073 w  |                                                                   |
| 1135 m  | 1135 w  | 1128 m  | pyrrole breathing                                                 |
|         | 1179 w  |         |                                                                   |
| 1204 m  | 1210 m  | 1200 m  | $\delta$ C-H                                                      |
| 1245 m  | 1244 m  | 1241 w  |                                                                   |
| 1317 m  | 1323 m  | 1314 s  | $\delta$ C-H<br>$\nu$ $\text{C}_\alpha\text{-C}_\beta$ (pyrrole)  |
| 1406 m  | 1408 w  | 1408 m  | $\nu$ C=N                                                         |
| 1429 m  | 1425 w  | 1427 w  | $\nu$ C=N                                                         |
| 1459 m  | 1457 w  | 1460 w  | $\nu$ C=N                                                         |
| 1505 sh | 1507 sh | 1505 sh | $\nu$ $\text{C}_\beta\text{-C}_\beta$ (pyrrole)<br>$\nu$ C=N(aza) |
| 1600 s  | 1602 s  | 1598 w  | $\nu$ benzene                                                     |

## Reference

- 1 G. Lu, J. Li, X. Jiang, Z. Ou and K. M. Kadish, *Inorg. Chem.*, 2015, **54**, 9211-9222.
